# Supplementary material
Source: Springer Nature journal article supplement (https://www.springermedizin.de/resource/supplementary/12891_2013_1913_MOESM1_ESM.pdf/9508780)

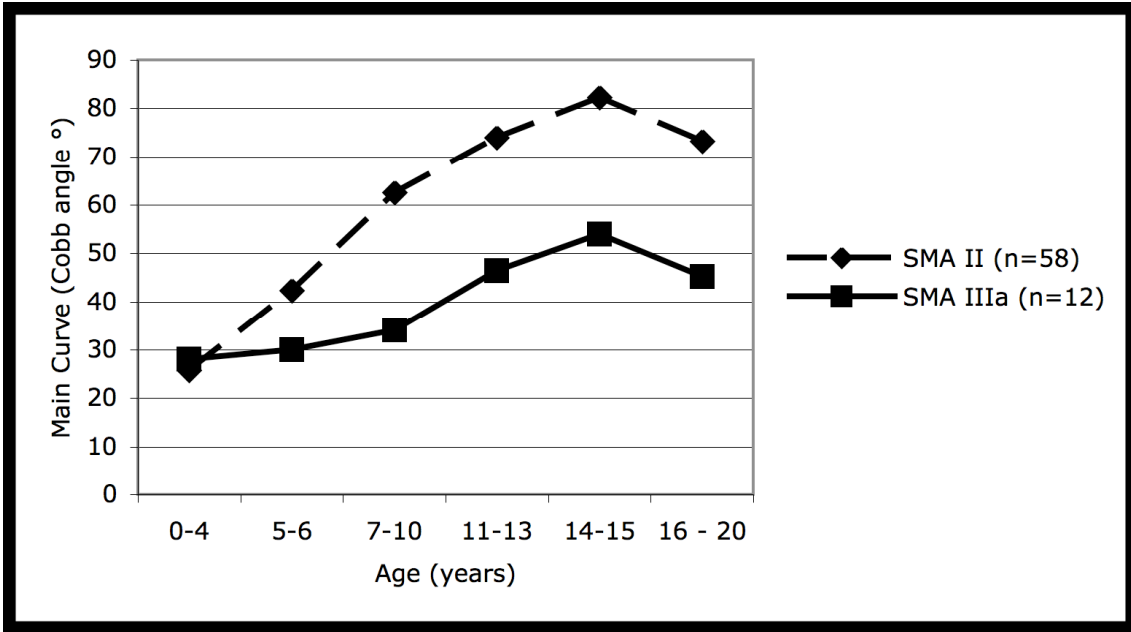

Figure 1: Course of main curvature in SMA II and IIIa patients not operated on

Supplement: MOESM1 [file 9508780]
